# Supplementary material
Source: HighWire-hosted journal article supplement (https://cmajopen.ca/highwire/filestream/81096/field_highwire_adjunct_files/1/2017-0161-2-at.pdf)
Supplement: 2017-0161-2-at.pdf [file 2017-0161-2-at.pdf]

**Appendix 2 (as supplied by the authors): Supplementary tables**

Supplementary Table A1 - Total systemic therapy expenditure, prescription volume, and number of users by year, 2006-2013

|      | British Columbia |                     |        | Saskatchewan |                     |       |
|------|------------------|---------------------|--------|--------------|---------------------|-------|
|      | Expenditure      | Prescription volume | Users  | Expenditure  | Prescription volume | Users |
| 2006 | 119,009,671      | 219,227             | 26,875 | 24,501,738   | 57,673              | 5,928 |
| 2007 | 115,535,452      | 220,740             | 27,747 | 28,521,196   | 61,080              | 6,154 |
| 2008 | 128,270,693      | 237,430             | 29,093 | 35,942,647   | 67,890              | 6,423 |
| 2009 | 142,838,050      | 250,612             | 30,257 | 36,345,382   | 71,118              | 6,719 |
| 2010 | 163,691,852      | 268,975             | 31,261 | 42,935,143   | 75,956              | 6,987 |
| 2011 | 171,535,815      | 281,408             | 31,979 | 45,952,956   | 81,830              | 7,328 |
| 2012 | 193,387,901      | 305,602             | 33,282 | 47,003,157   | 82,174              | 7,327 |
| 2013 | 205,722,695      | 316,953             | 34,069 | 53,965,596   | 87,755              | 7,485 |

Expenditure expressed in 2013 Canadian dollars
